# Supplementary material for: Antifouling UV-treated GO/PES hollow fiber membranes in a membrane bioreactor (MBR)
Source: Royal Society of Chemistry journal article supplement (doi:10.1039/c9ew00217k), 2019-01-01
Supplement: c9ew00217k1.pdf [file c9ew00217k1.pdf]

## Supporting Information

### Antifouling UV-treated GO/PES Hollow fiber membrane in membrane bioreactor (MBR)

Mahdi Fathizadeh<sup>a#</sup>, Weiwei L. Xu<sup>b#</sup>, Margaret Shen<sup>c#</sup>, Emily Jeng<sup>d#</sup>, Fanglei Zhou<sup>b</sup>, Qiaobei Dong<sup>b</sup>, Dinesh Behera<sup>b</sup>, Zhuonan Song<sup>a</sup>, Lei Wang<sup>a</sup>, Abolfazl Shakouri<sup>a</sup>, Konstantin Khivantsev<sup>a</sup>, and Miao Yu<sup>b\*</sup>

<sup>1</sup>Department of Chemical Engineering, University of South Carolina, Columbia, SC 29208, USA.

<sup>2</sup> Department of Chemical and Biological Engineering, Rensselaer Polytechnic Institute, Troy, NY 12180, USA

<sup>3</sup> Science, Mathematics, and Computer Science Magnet Program, Montgomery Blair High School, 51 University Blvd E, Silver Spring, MD 20901, USA.

<sup>4</sup> School of Chemical and Biomolecular Engineering, Cornell University, Ithaca, New York 14853, United States

#: Contribute equally

\*: Corresponding author; Email: [yum5@rpi.edu](mailto:yum5@rpi.edu)

### Table of Figures

|                                                                                                                                                                                                                                                                                                                                                                              |   |
|------------------------------------------------------------------------------------------------------------------------------------------------------------------------------------------------------------------------------------------------------------------------------------------------------------------------------------------------------------------------------|---|
| Figure S 1.(a) AFM image of as-prepared single layer featured GO flakes; (b) The ATR-FTIR of SLGO and UV-treated SLGO in the solution .....                                                                                                                                                                                                                                  | 2 |
| Figure S 2. The ATR-FTIR spectrum of pristine PES HF and SLGO/UV-treated SLGO coated PES HF membranes.....                                                                                                                                                                                                                                                                   | 3 |
| Figure S 3. The pore size distribution of PES HF membranes prepared with different amount of SLGO loading, the results are analyzed by ImageJ from FESEM provided in Figure 3.....                                                                                                                                                                                           | 4 |
| Figure S 4 FESEM and AFM topological scan of PES HF membranes coated with SLGO flakes irradiated by different duration of UV-treatment. (A), (B) SEM and AFM images of PES_GO <sub>6.20</sub> _UV <sub>0.5</sub> ; (C), (D) SEM and AFM images of PES_GO <sub>6.20</sub> _UV <sub>1.0</sub> ; (E), (F) SEM and AFM images of PES_GO <sub>6.20</sub> _UV <sub>1.5</sub> ..... | 5 |

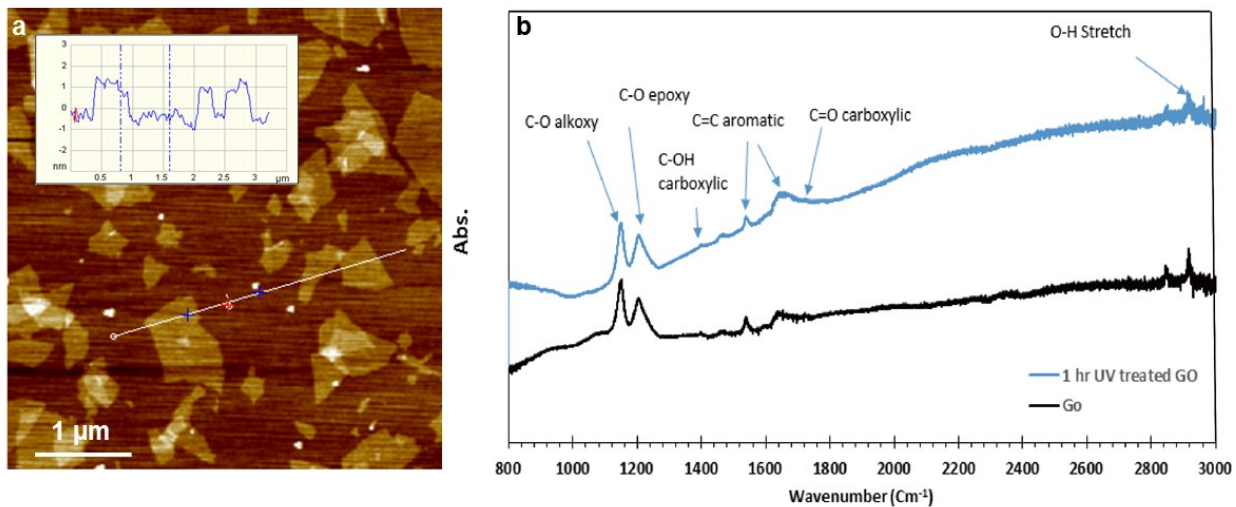

Figure S 1.(a) AFM image of as-prepared single layer featured GO flakes; (b) The ATR-FTIR of SLGO and UV-treated SLGO in the solution

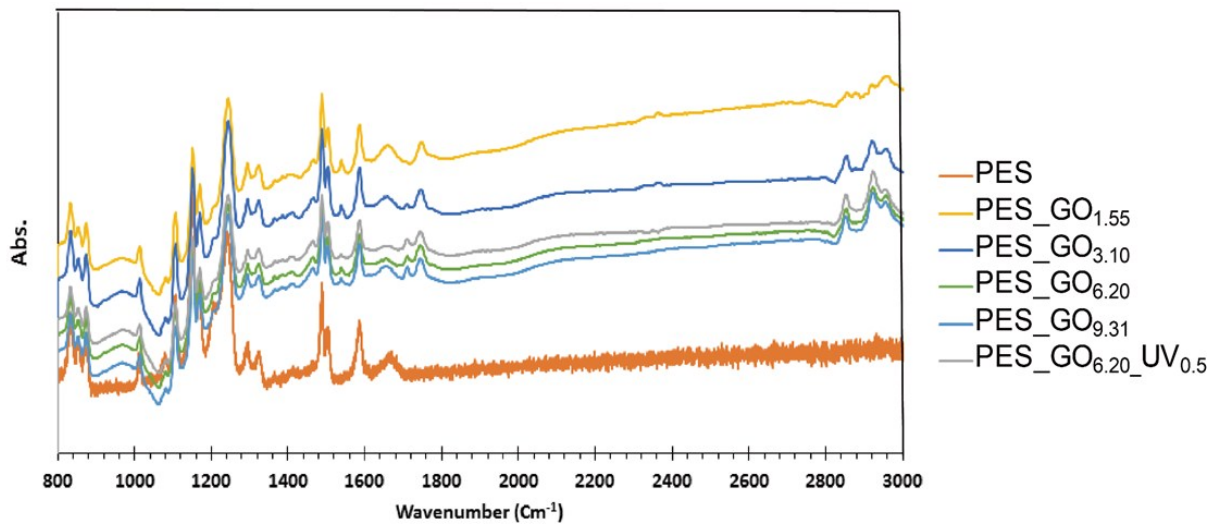

Figure S 2. The ATR-FTIR spectrum of pristine PES HF and SLGO/UV-treated SLGO coated PES HF membranes

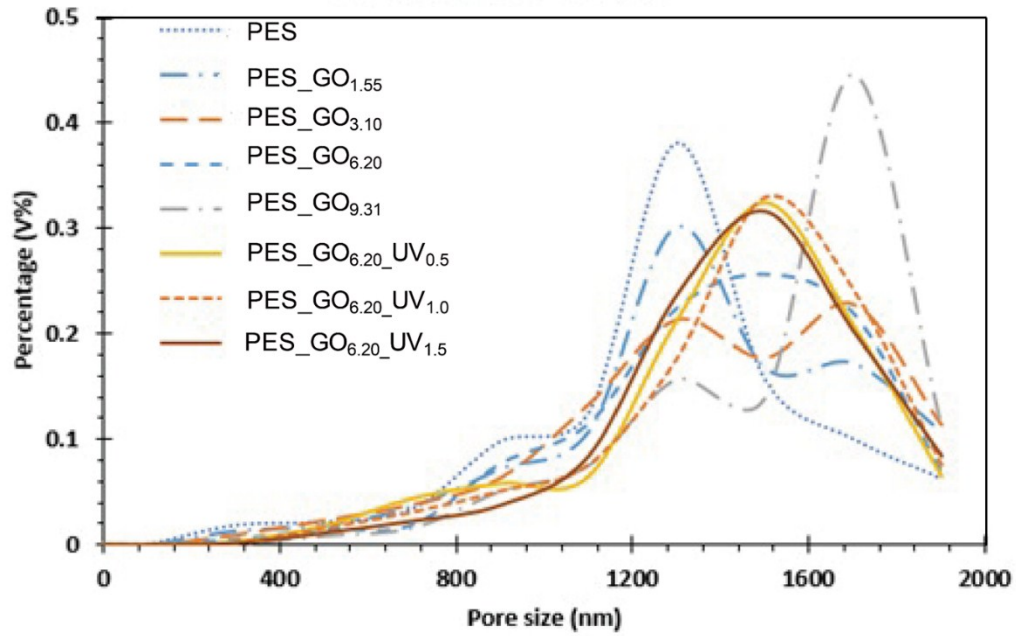

Figure S 3. The pore size distribution of PES HF membranes prepared with different amount of SLGO loading, the results are analyzed by ImageJ from FESEM provided in Figure 3.

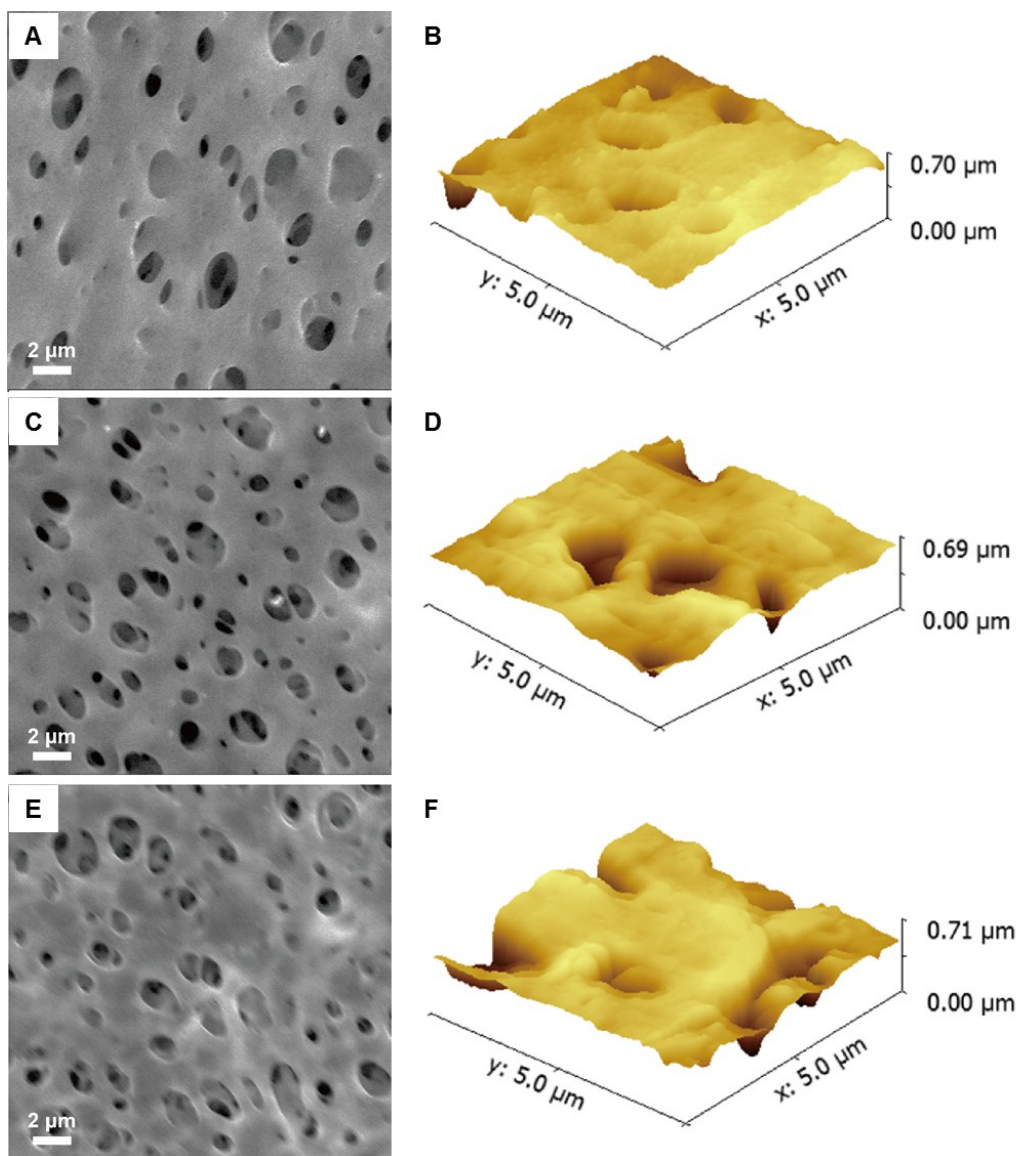

Figure S 4 FESEM and AFM topological scan of PES HF membranes coated with SLGO flakes irradiated by different duration of UV-treatment. (A), (B) SEM and AFM images of PES<sub>GO<sub>6.20</sub></sub>\_UV<sub>0.5</sub>; (C), (D) SEM and AFM images of PES<sub>GO<sub>6.20</sub></sub>\_UV<sub>1.0</sub>; (E), (F) SEM and AFM images of PES<sub>GO<sub>6.20</sub></sub>\_UV<sub>1.5</sub>
